# Supplementary material
Source: HighWire-hosted journal article supplement (https://erj.ersjournals.com/content/58/4/2100915)
Supplement: inline-supplementary-material-1 [file inline-supplementary-material-1.pdf]

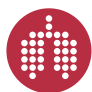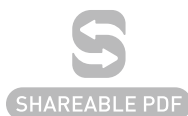

# Digital-Rapid On-site Examination in Endobronchial Ultrasound-Guided Transbronchial Needle Aspiration (DEBUT): a proof of concept study for the application of artificial intelligence in the bronchoscopy suite

Shahir Asfahan<sup>1</sup>, Poonam Elhence <sup>2</sup>, Naveen Dutt<sup>1</sup>, Ram Niwas Jalandra<sup>1</sup> and Nishant Kumar Chauhan<sup>1</sup>

<sup>1</sup>Dept of Pulmonary Medicine, All India Institute of Medical Sciences, Jodhpur, India. <sup>2</sup>Dept of Pathology, All India Institute of Medical Sciences, Jodhpur, India.

Nishant Kumar Chauhan ([nishant97@gmail.com](mailto:nishant97@gmail.com))

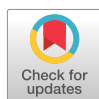

Shareable abstract (@ERSpublications)

**Artificial intelligence using open source deep neural network is able to classify on-site cytology smears during EBUS-TBNA procedure in the bronchoscopy suite** <https://bit.ly/3vcRYX1>

**Cite this article as:** Asfahan S, Elhence P, Dutt N, *et al.* Digital-Rapid On-site Examination in Endobronchial Ultrasound-Guided Transbronchial Needle Aspiration (DEBUT): a proof of concept study for the application of artificial intelligence in the bronchoscopy suite. *Eur Respir J* 2021; 58: 2100915 [DOI: 10.1183/13993003.00915-2021].

This single-page version can be shared freely online.

Copyright ©The authors 2021. For reproduction rights and permissions contact [permissions@ersnet.org](mailto:permissions@ersnet.org)

Received: 17 March 2021  
Accepted: 6 June 2021

## To the Editor:

Endobronchial ultrasound guided transbronchial needle aspiration (EBUS-TBNA) has become the standard of care for sampling mediastinal and hilar lesions and is finding increased acceptance for diagnostic as well as staging purposes [1]. EBUS-TBNA is an expensive procedure due to the high cost of equipment [2]. A repeat procedure in case of an inconclusive outcome adds to the burgeoning expenditure. To circumvent this, rapid on-site examination (ROSE) has been adopted to reduce the number of needle punctures and decrease the requirement for additional procedures [3]. However, ROSE requires presence of a pathologist or cyto-technicians in the bronchoscopy suite.
